# Supplementary material for: Triple quadrupole LC/MS method for the simultaneous quantitative measurement of cefiderocol and meropenem in serum
Source: Royal Society of Chemistry journal article supplement (doi:10.1039/d2ay01459a), 2023-01-01
Supplement: d2ay01459a1.pdf [file d2ay01459a1.pdf]

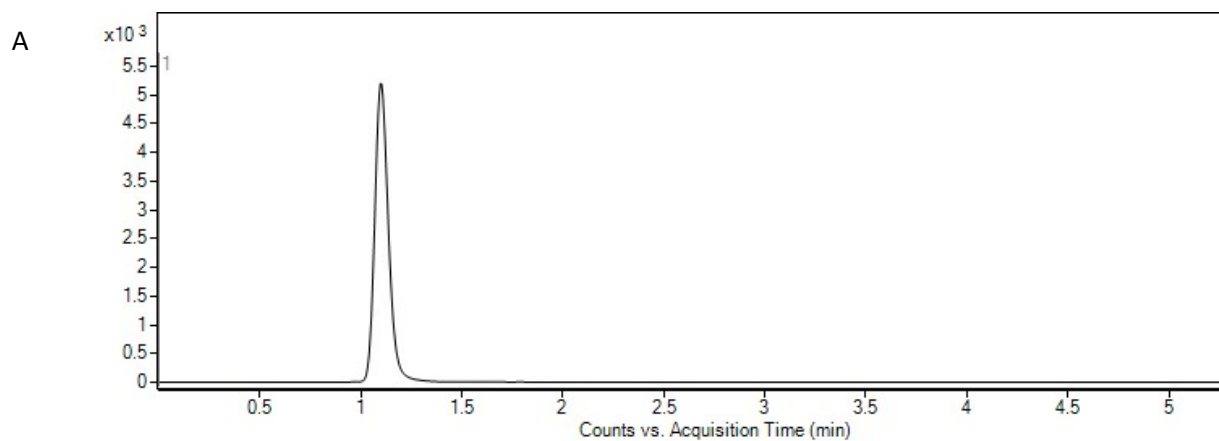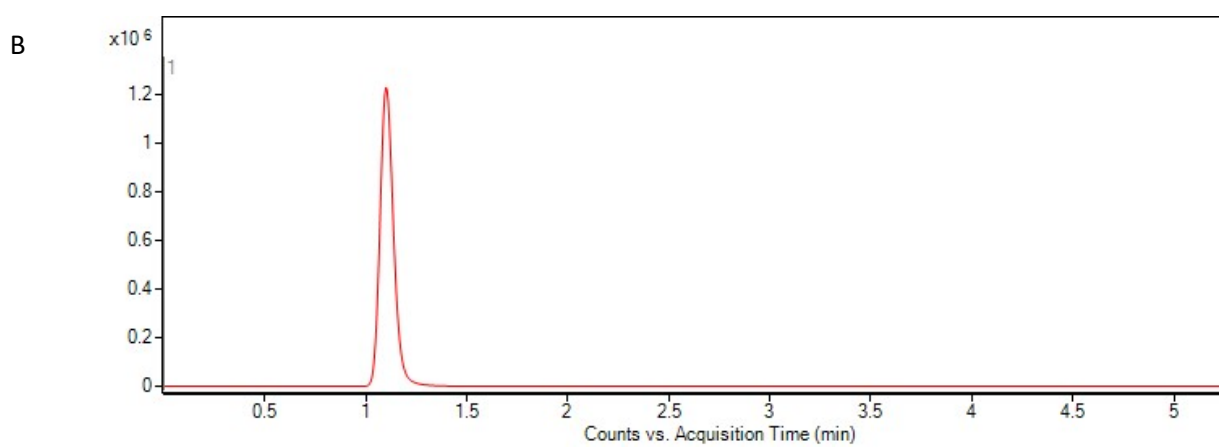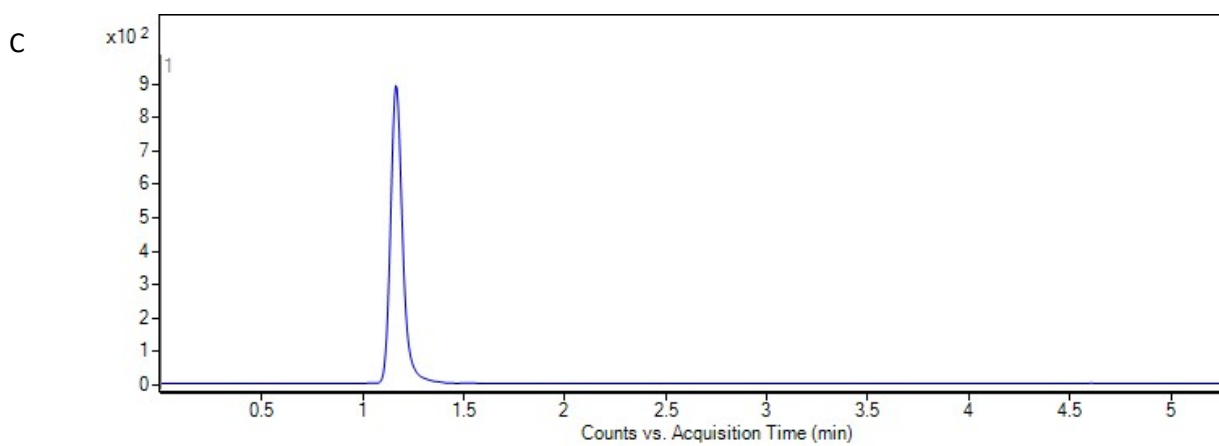

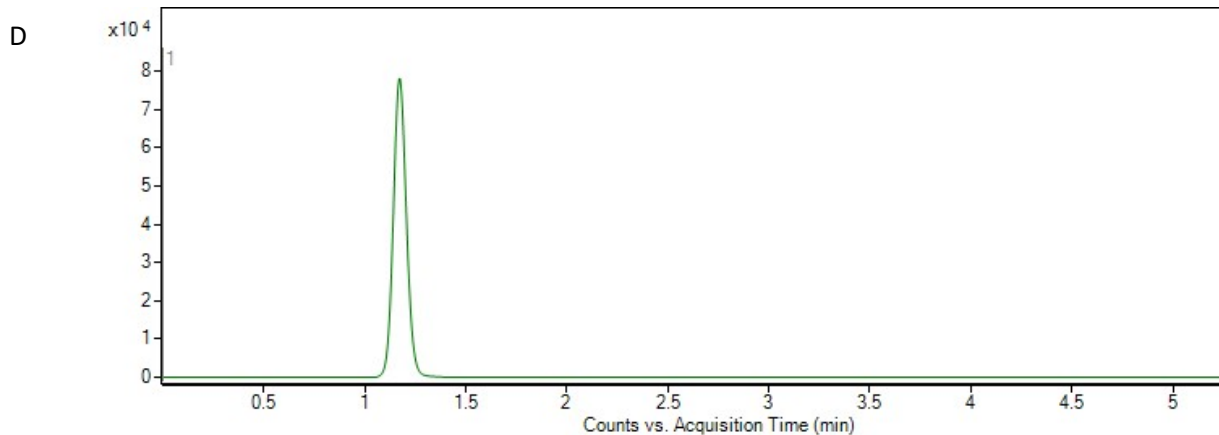

Figure 1S. Chromatograms in the serum sample spiked with meropenem, IS (A), meropenem(B), cefiderocol, IS (C), cefiderocol (D)

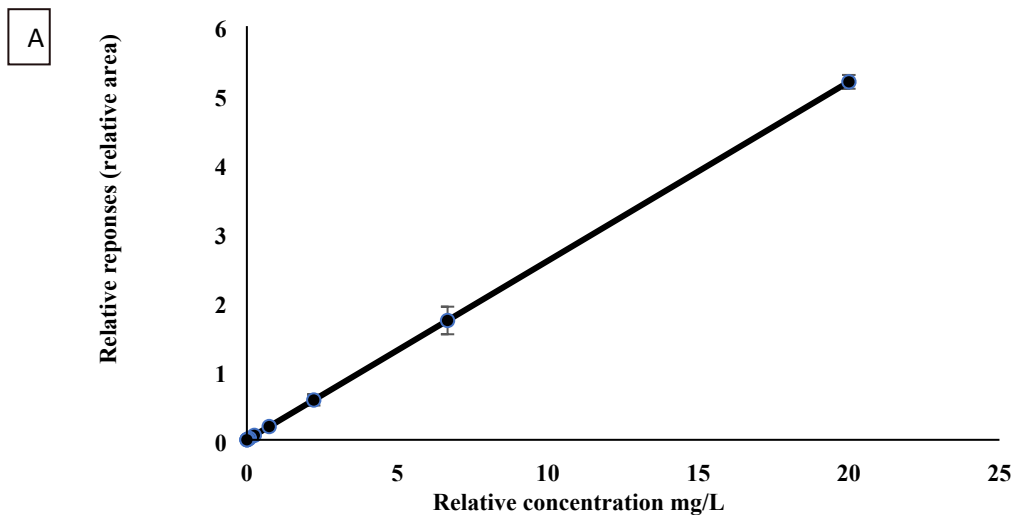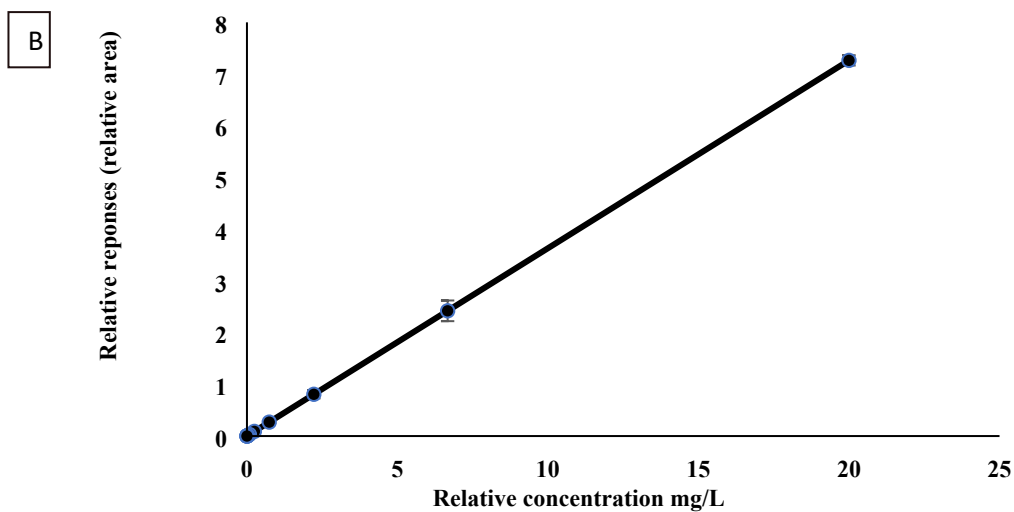

Fig. 2S The LC/MS calibration curve showing the relative area of analyte ( A: cefiderocol. B: meropenem) to internal standard plotted against relative concentration analyte to internal standard. Each data point represents the average of

**six separately prepared spiked standards.**

*a* Weighting was  $1/x$  for all analytes.  $R^2$ , coefficient of determination.
